# Supplementary material for: Herpesvirus surveillance and discovery in zoo-housed ruminants
Source: PLoS One. 2021 Jan 28;16(1):e0246162. doi: 10.1371/journal.pone.0246162 (PMC7842878; doi:10.1371/journal.pone.0246162)
Supplement: S2 Table — (XLSX) [file pone.0246162.s002.xlsx]

## Sheet: S2 Table
S2 Table. Amino acid GenBank BLAST results.
Genotype designation in current study	Identity	Highest amino acid identity (accession number)	Host species in present study (no. disease animals/no. positive animals)	Tentatively assigned name for new viral species (host common name)
01	58.6%	Impala herpesvirus 1 (BAD91547)	Cape blue duiker (2/3)	Philantomba monticola (Cape blue duiker) GHV 1
02	96.6%	Fallow deer lymphotrophic herpesvirus (AAY86083)	Cape blue duiker (1/1), Persian goitered gazelle (1)	Bovidae GHV 1
03	91.5%	Caprine gammaherpesvirus 2 (ADY17124)	East Caucasian tur (3), Eastern bongo (3/3), Eastern giant eland (1), Southern gerenuk (1), West Caucasian tur (2)	.
04	100%	Type 2 ruminant rhadinovirus in red deer (ASB30692)	Barbary red deer (1), Cuvier's gazelle (1), Eastern yellow-backed duiker (1/1), Gambian Maxwell's duiker (1), Indian sambar (2), Indochinese sika (5), Javan banteng (1), Javan rusa (7), Malayan Sambar (3), Mandarin sika (4), Pere David's deer (1), Sudan red-fronted gazelle (1), Uganda kob (2), White-lipped deer (2), Zambesi lechwe (1)	.
05	74.1%	Springbok herpesvirus 1 (BAD91545)	Blackbuck (1), Cretan wild goat (1)	Bovidae GHV 2
06	87.9%	Alcelaphine gammaherpesvirus 1 (AAC59452)	Eastern yellow-backed duiker (1/1), Zambian sable antelope (2)	Bovidae GHV 3
07	96.6%	Type 1 ruminant rhadinovirus in ibex (AAO61283)	Alpine ibex (7), Angolan roan antelope (1), East African eland (1), White-lipped deer(1)	Ruminant GHV 1
08	96.6%	Ovine gammaherpesvirus 2 (AEE01165)	Sudan red-fronted gazelle (1)	Eudorcas rufifrons (Sudan red-fronted gazelle) GHV 3
09	87.9%	Type 2 ruminant rhadinovirus in black-tailed deer (AAO88177)	Eastern yellow-backed duiker (1/1), North Indian muntjac (1)	Ruminant GHV 2
10	100%	Waterbuck macavirus (ADY17134)	Domestic cattle (1), Ellipsen waterbuck (5), Javan rusa (2), Scimitar-horned oryx (2), Indian sambar (1)	Ruminant GHV 3
11	74.1%	Springbok herpesvirus 2 (BAD91546)	Cape blue duiker (1/1), Red-flanked duiker (1/1)	Cephalophinae (Duiker) GHV 1
12	72.4%	Springbok herpesvirus 2 (BAD91546)	Red-flanked duiker (4)	Cephalophus rufilatus (Red-flanked duiker) GHV 1
13	100%	Vaal rhebok herpesvirus (AAV83933)	Vaal rhebok (5)	.
14	94.8%	Sambar gammaherpesvirus (ASB51411)	Indian sambar (5)	Rusa unicolor unicolor (Indian sambar) GHV 1
15	89.7%	Alcelaphine gammaherpesvirus 2 (AAM19757)	Jimela topi (3), Slender-horned gazelle (1/3)	Bovidae GHV 4
16	74.5%	Vaal rhebok herpesvirus (AAV83933)	Desert bighorn (2), Arabian oryx (1)	Bovidae GHV 5
17	96.6%	Type 2 ruminant rhadinovirus in red deer (ASB30692)	Javan rusa (1)	Rusa timorensis (Javan rusa) GHV 1
18	77.4%	Caprine gammaherpesvirus 2 (AAG21351)	Burmese thamin (1)	Rucervus eldii (Burmese thamin) GHV 1
19	60.8%	Impala herpesvirus 1 (BAD91547)	Eastern giant eland (2), Southern gerenuk (1)	Bovidae GHV 9
20	87.7%	Alcelaphine gammaherpesvirus 2 (AAM19757)	Jimela topi (1)	Damaliscus korrigum (Jimela topi) GHV 1
21	96.4%	Sambar gammaherpesvirus (ASB51411)	Indian sambar (1)	Rusa unicolor unicolor (Indian sambar) GHV 2
22	98%	Macavirus strain wasserbock (ADY17134)	Addax (1), Indian axis deer (1), Nile lechwe (4), Uganda kob (1)	Ruminant GHV 4
23	100%	Springbok herpesvirus 1 (BAD91545)	Barasingha (1), East African sitatunga (2), South African greater kudu (2), South African springbok (8)	.
24	82.8%	Gammaherpesvirinae sp. in pere david's deer (ASB30701)	Indian hog deer (1)	Axis porcinus (Indian hog deer) GHV 1
25	100%	Type 2 ruminant rhadinovirus in red deer(ASB30692)	Javan rusa (3), Sand gazelle (1)	.
26	100%	Impala herpesvirus (BAD91547)	Kenya impala (4)	.
27	100%	Type 2 ruminant rhadinovirus in addax (AAO88181)	Addax (2), Arabian oryx (1)	Hippotraginae GHV 2
28	83.9%	Springbok herpesvirus 1 (BAD91545)	Nubian ibex (1)	Capra nubiana (Nubian ibex) GHV 1
29	73.3%	Springbok herpesvirus 1 (BAD91545)	Persian goitered gazelle (1)	Gazella subgutturosa (Persian goitered-gazelle) GHV 1
30	58.1%	Impala herpesvirus 1 (BAD91547)	Sudan red-fronted gazelle (1)	Eudorcas rufifrons (Sudan red-fronted gazelle) GHV 1
31	100%	Oryx rhadinovirus 1 (AAO61284)	Gemsbok (2), Nile lechwe (1)	.
32	98.3%	Bovine herpesvirus 6 (AAO88182)	Domestic cattle (1)	.
33	70%	Springbok herpesvirus 2 (BAD91546)	Sudan red-fronted gazelle (1)	Eudorcas rufifrons (Sudan red-fronted gazelle) GHV 2
34	94.6%	Waterbuck macavirus (ADY17134)	Ellipsen waterbuck (1)	Kobus ellipsiprymnus (Ellipsen waterbuck) GHV 1
35	100%	Waterbuck macavirus (ADY17134)	Ellipsen waterbuck (1)	Kobus ellipsiprymnus (Ellipsen waterbuck) GHV 2
36	70.2%	Springbok herpesvirus 2 (BAD91546)	Malayan sambar (1)	Rusa unicolor equina (Malayan sambar) GHV 1
37	95.8%	Type 2 ruminant rhadinovirus in red deer (ASB30692)	Javan rusa (1)	Rusa timorensis (Javan rusa) GHV 2
38	100%	Caprine gammaherpesvirus 2 (ADY17124)	Domestic goat (1)	.
39	70%	Springbok herpesvirus 2 (BAD91546)	Cavendish's dik dik (2)	Madoqua kirkii (Cavendish's dik dik) GHV 1
40	98.1%	Springbok herpesvirus 2 (BAD91545)	Speke's gazelle (1)	Gazella spekei (Speke's gazelle) GHV 1
41	74.1%	Springbok herpesvirus 2 (BAD91546)	Cape blue duiker (1)	Philantomba monticola (Cape blue duiker) GHV 2
42	55.9%	Springbok herpesvirus 2 (BAD91546)	Southern steenbok (2)	Litocranius walleri (Southern gerenuk) GHV 1
43	93.8%	Waterbuck macavirus (ADY17134)	Vaal rhebok (1)	Pelea capreolus (Vaal rhebok) GHV 1
44	100%	Ovine gammaherpesvirus 2 (AEE01165)	Domestic goat (1/1)	.
